# Supplementary material
Source: Springer Nature journal article supplement (https://www.springermedizin.de/resource/supplementary/12885_2007_1124_MOESM5_ESM.pdf/9471170)

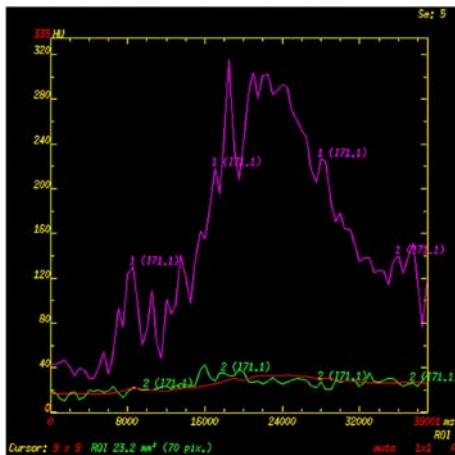

A

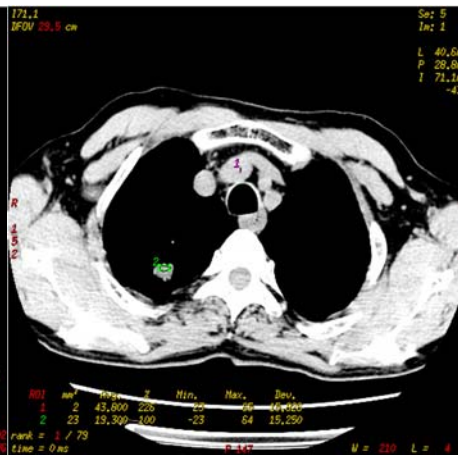

B

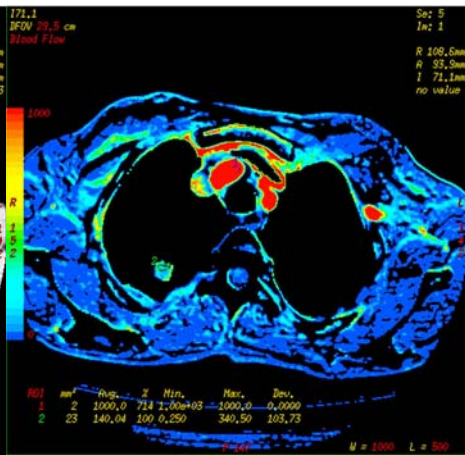

C

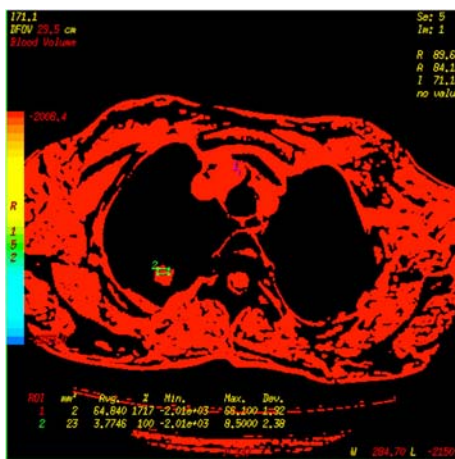

D

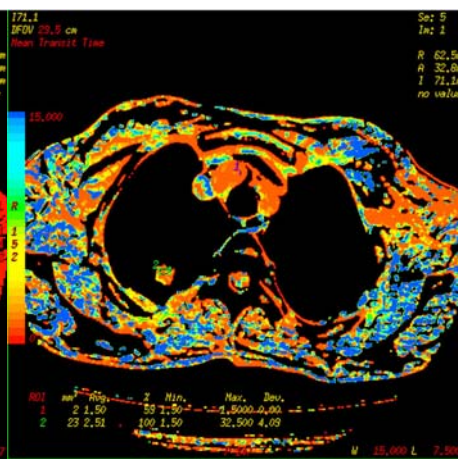

E

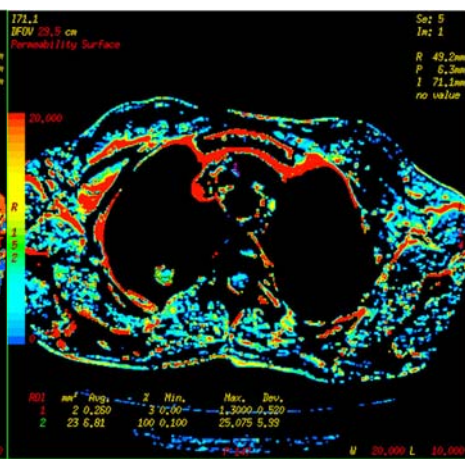

F

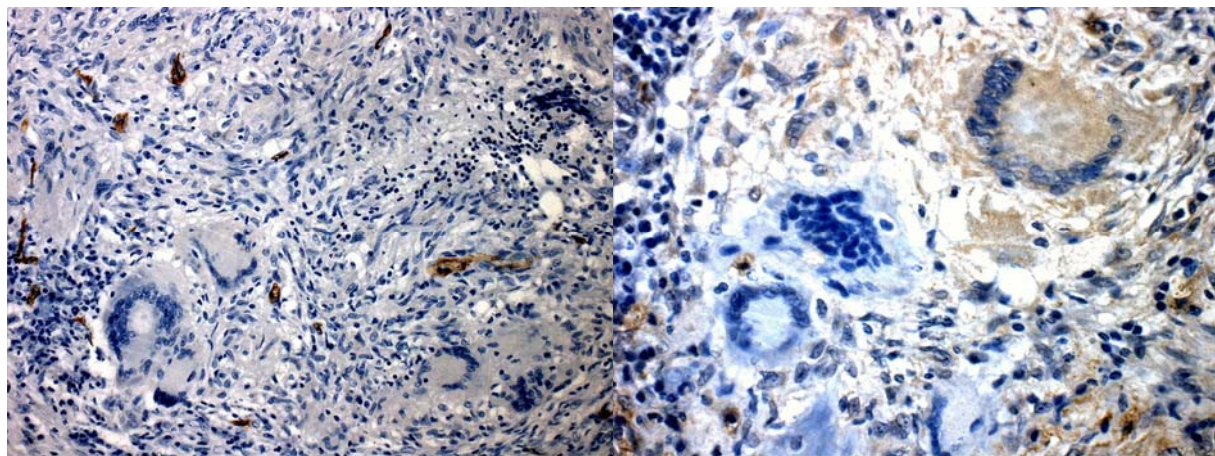

G

H

Supplement: MOESM5 [file 9471170]
